# Supplementary material
Source: PubMed Central journal article supplement (PMC4625660)

## Supplement

1. Figure 1: page 2
2. Figure 2: page 3

Supplement figure 1: C3 and C4d staining. Top panel shows C3 staining and bottom panel shows C4d staining. Each vertical panel is one case. A, B: shows an immune complex GN showing positive C3 and C4d; C,D: shows a C3GN showing positive C3 and negative C4d at high power(40x); E,F: shows a C3GN showing positive C3 and negative C4d at low power (10x); and G,H: shows negative C3 and mild mesangial background staining for C4d in a 1 year transplant protocol biopsy showing no significant morphologic changes on light microscopy. Arrows point to glomerulus.

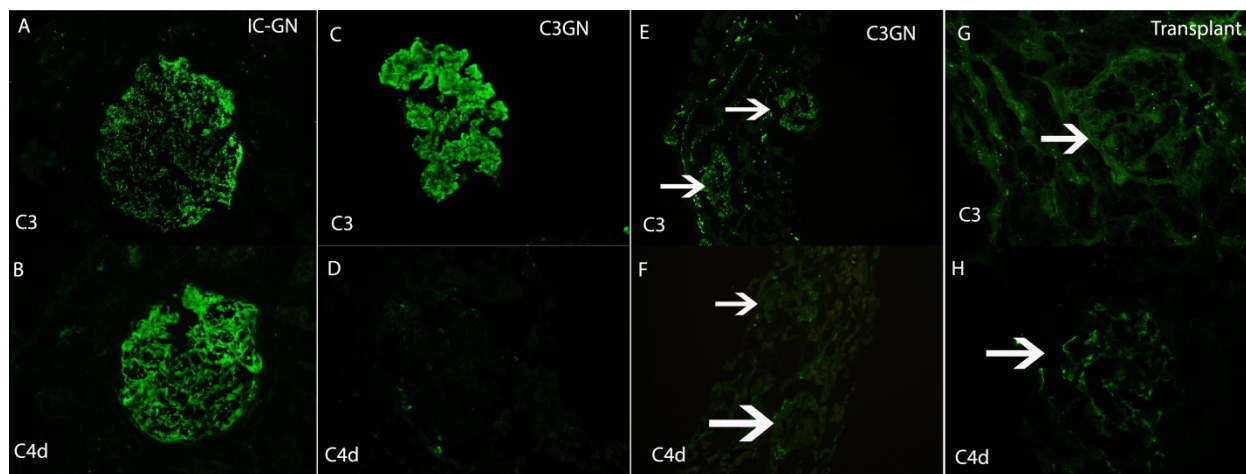

Supplement figure 2: C3 and C4d staining. Top panel shows C3 staining and bottom panel shows C4d staining. Each vertical panel is one case. A, B: shows hypertensive nephrosclerosis showing negative glomerular C3 and C4d (note positive staining at vascular pole for bright C3 and mild C4d); C,D: shows a biopsy of minimal change disease with trace mesangial C3 and negative C4d (40x); E,F: shows a biopsy of thin basement membrane nephropathy showing trace mesangial C3 and negative C4d at low power (40x).

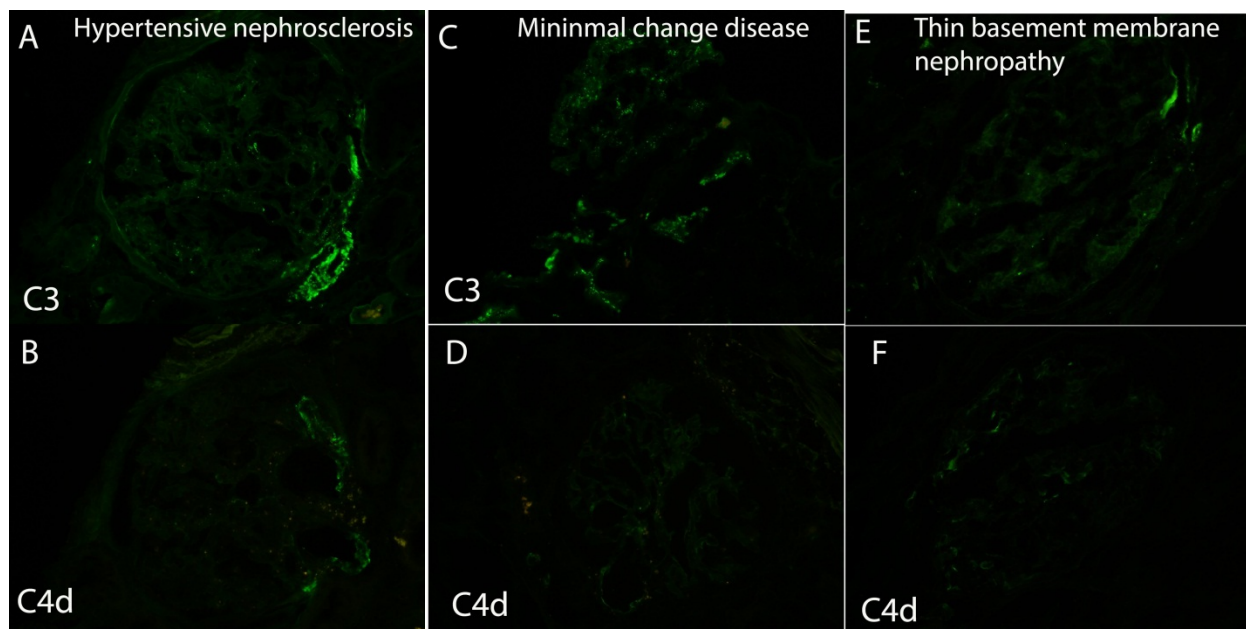

Supplement: ASN.2014040406_ASN2014040406SupplementaryData.pdf [file ASN.2014040406_ASN2014040406SupplementaryData.pdf]
